# Supplementary material for: 40 Hz light flickering promotes sleep through cortical adenosine signaling
Source: PubMed Central journal article supplement (PMC10907382; doi:10.1038/s41422-023-00920-1), 2024-02-08
Supplement: 41422_2023_920_MOESM2_ESM.pdf [file 41422_2023_920_MOESM2_ESM.pdf]

**a**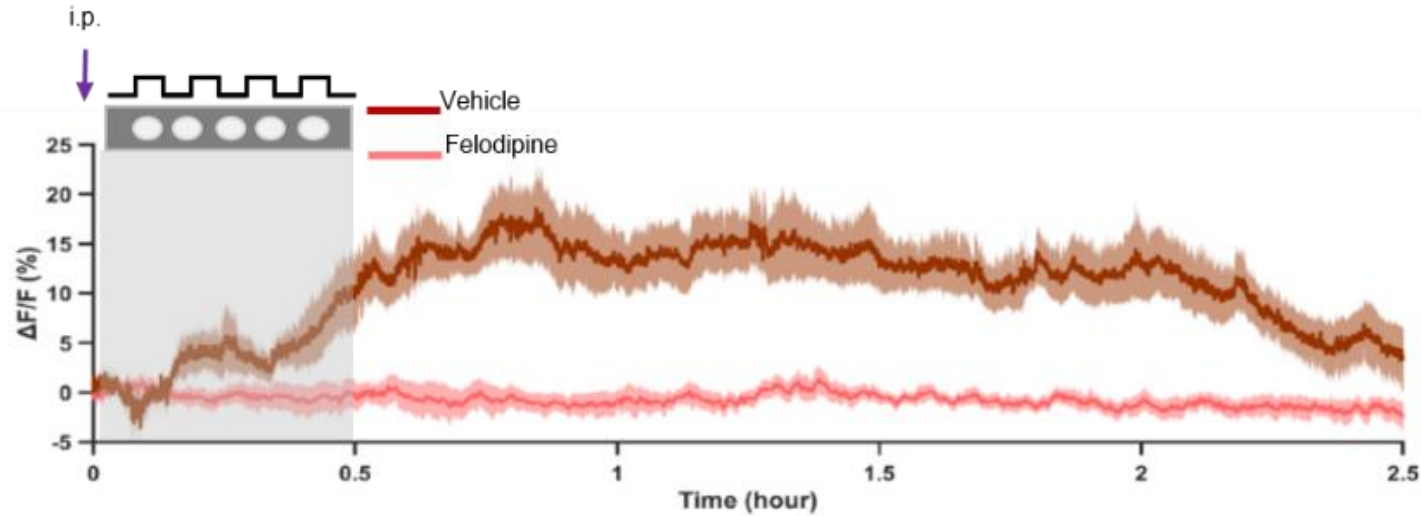**b**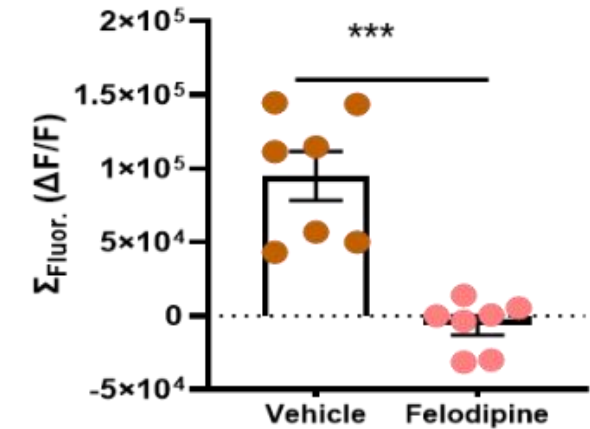

**Fig. S2 40 Hz flashing -dependent Ado release is blocked by inhibitors of L-type voltage-gated calcium channels (VGCCs).** **a** Pretreatment with an L-type VGCC inhibitor felodipine (10 mg/kg, i.p.) abolished the increased extracellular adenosine levels induced by 40 Hz flashing ( $n = 7/\text{group}$ ). **b** Quantification of L-type VGCC inhibitor felodipine-abolished adenosine signaling response to 40 Hz flickering in (a). The data are presented as mean  $\pm$  SEM, \*\*\* $P < 0.001$ , Student's t-test; felodipine-treated group vs. vehicle group.
