# Supplementary material for: 40 Hz light flickering promotes sleep through cortical adenosine signaling
Source: PubMed Central journal article supplement (PMC10907382; doi:10.1038/s41422-023-00920-1), 2024-02-08
Supplement: 41422_2023_920_MOESM3_ESM.pdf [file 41422_2023_920_MOESM3_ESM.pdf]

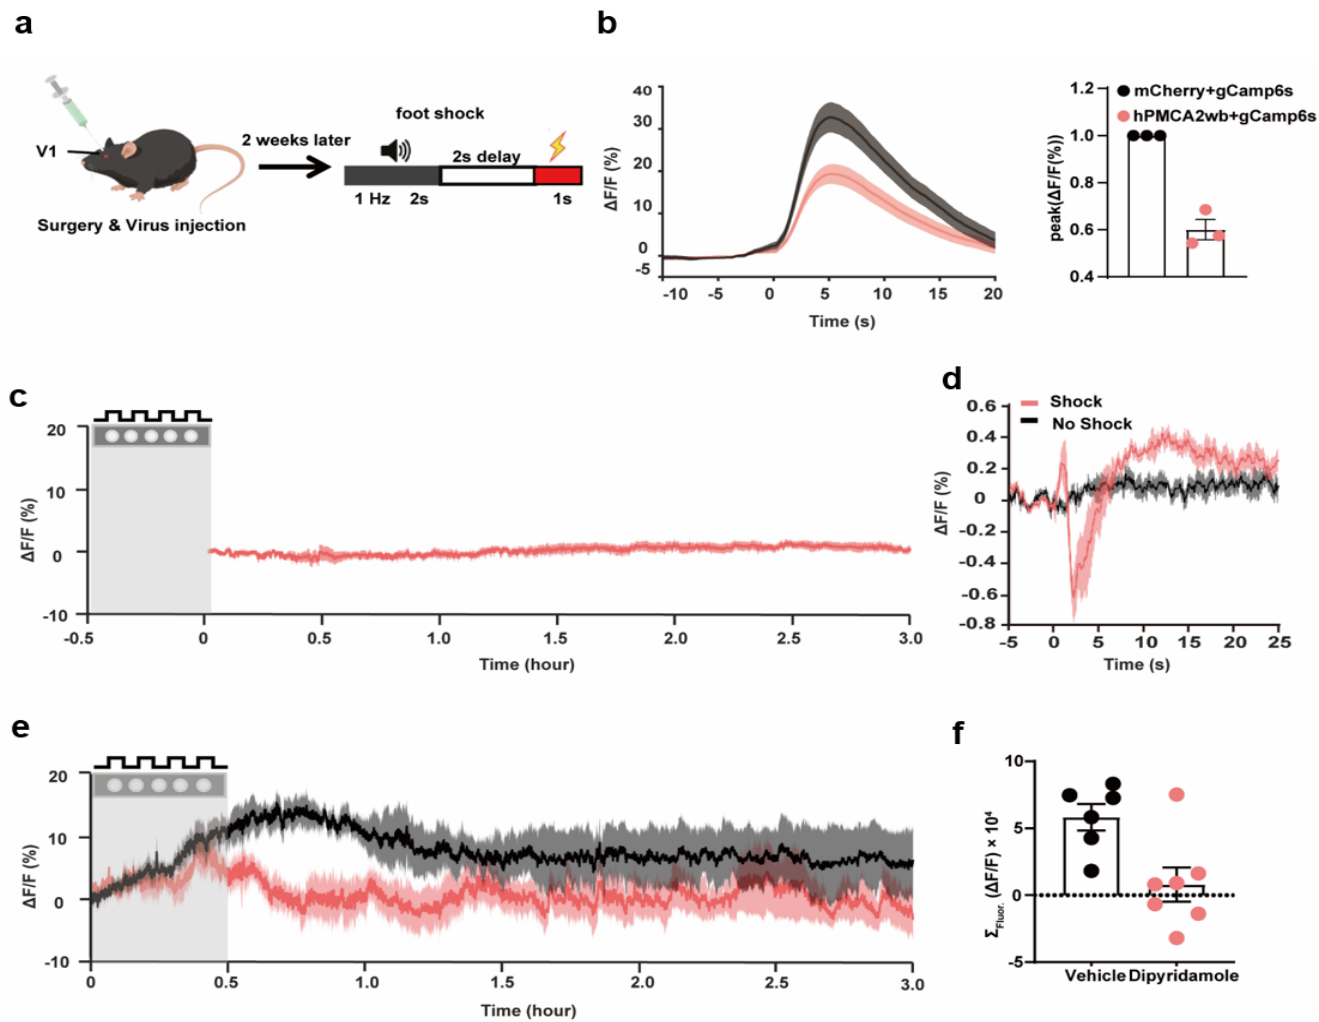

**Fig. S3 The sustained increase in extracellular adenosine was dependent on ENT activity not ATP release.** **a** Behavioral protocol for reward and foot shock conditioning tasks after expression of hPMCA2w/b in V1 two week. **b** Expression of hPMCA2w/b in V1 partially reduced astrocytic activity, as indicated by calcium signaling using gCaMP detector during foot shock conditioning tasks ( $n = 3/\text{group}$ ). **c & d** Measurement of extracellular ATP levels after 40 Hz flickering (left figure) and after electric shock in mice expressing GRAB<sub>ATP</sub> (right figure) ( $n = 6/\text{group}$ ). The data are presented as mean  $\pm$  SEM,  $**P < 0.01$ ,  $*P < 0.05$ , Student's t-test; dipyridamole-treated group vs. vehicle group. **e & f** Administering dipyridamole immediately after light flickering also eliminated 40 Hz flickering-induced subsequent extracellular adenosine generation after light flashing cessation ( $n = 6/\text{group}$ ). The data are presented as mean  $\pm$  SEM,  $**P < 0.01$ ,  $*P < 0.05$ , Student's t-test; dipyridamole-treated group vs. vehicle group.
