# Supplementary material for: 40 Hz light flickering promotes sleep through cortical adenosine signaling
Source: PubMed Central journal article supplement (PMC10907382; doi:10.1038/s41422-023-00920-1), 2024-02-08
Supplement: 41422_2023_920_MOESM6_ESM.pdf [file 41422_2023_920_MOESM6_ESM.pdf]

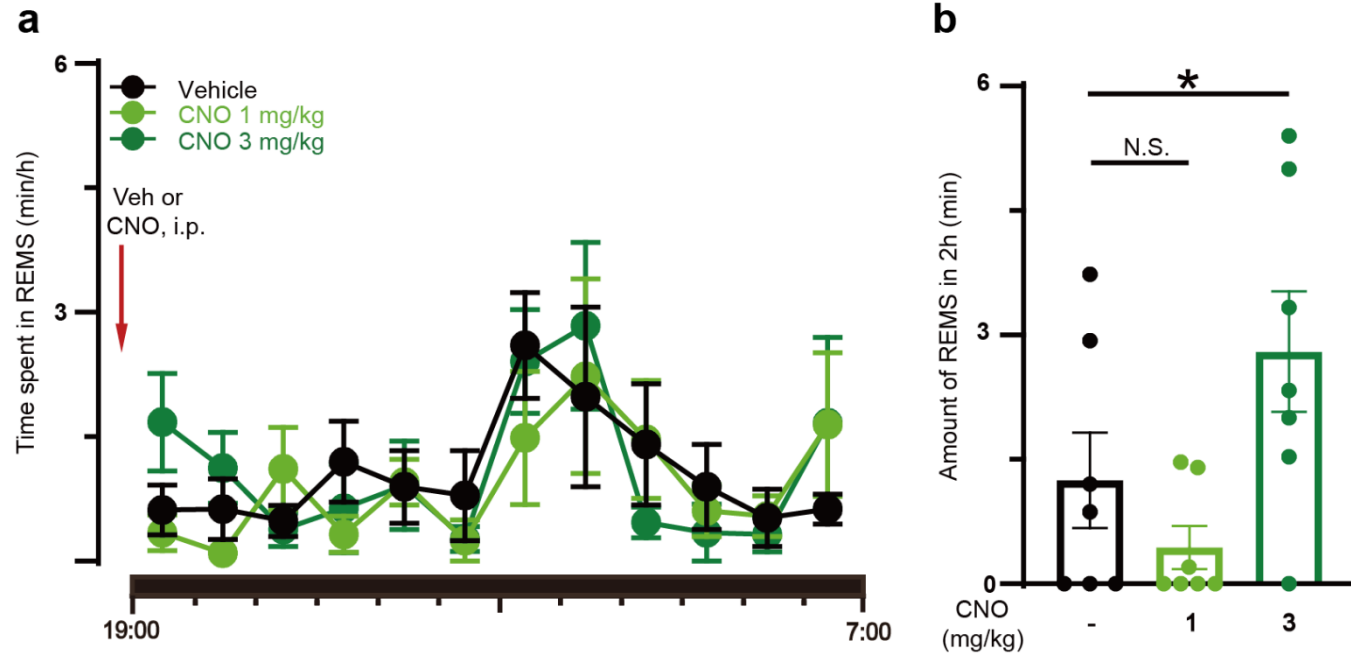

**Fig. S6 Chemogenetic inhibition of V1 neurons by hM4Di recaptures the increase of REMS in mice.** **a** Time-course of REMS after vehicle and CNO (1 mg/kg and 3 mg/kg) injections. **b** CNO at 3 mg/kg significantly increased REMS in mice. \* $p < 0.05$  vs vehicle, significance was assessed by one-way ANOVA.
