# Supplementary material for: 40 Hz light flickering promotes sleep through cortical adenosine signaling
Source: PubMed Central journal article supplement (PMC10907382; doi:10.1038/s41422-023-00920-1), 2024-02-08
Supplement: 41422_2023_920_MOESM8_ESM.pdf [file 41422_2023_920_MOESM8_ESM.pdf]

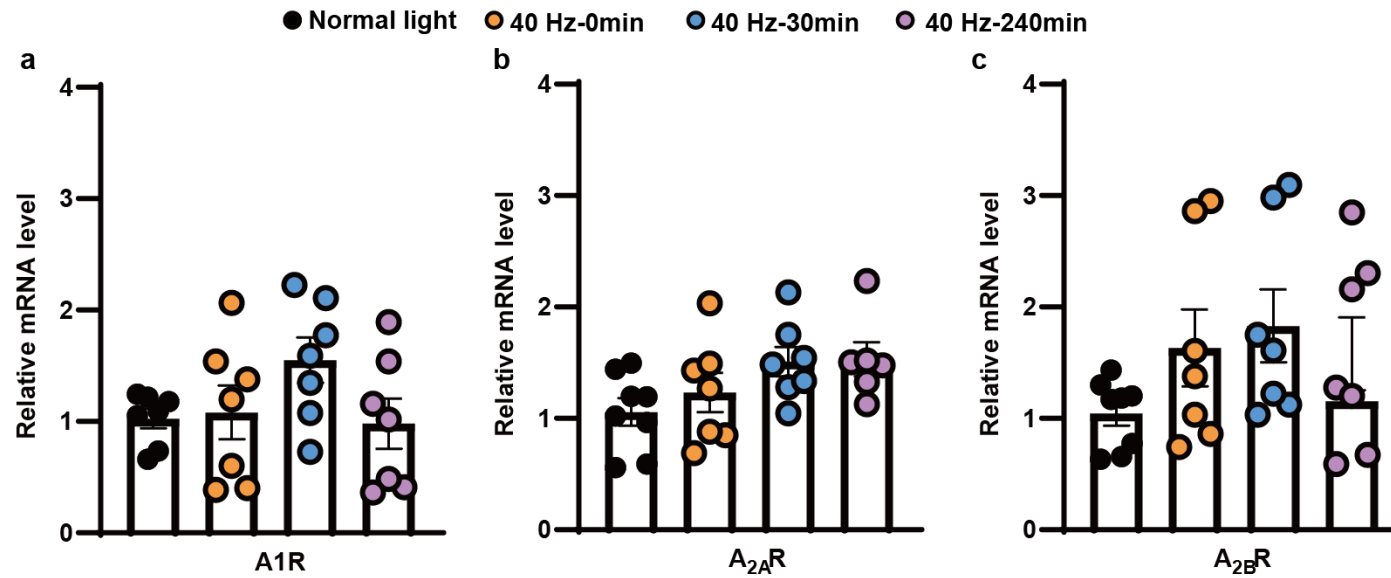

**Fig. S8** The mRNA expression of A1R, A<sub>2A</sub>R and A<sub>2B</sub>R was not affected by 40 Hz light flicking. **a-c** The effect of 40 Hz light flicking on the mRNA expression of A1R (a), A<sub>2A</sub>R (b) and A<sub>2B</sub>R (c), n=7. Yellow: sampling was performed immediately after 40 Hz flicker; Blue: 30 min after 40 Hz flicker, sampling was performed; Purple: 240 min after 40 Hz flicker, sampling was performed.
